# Supplementary material
Source: PubMed Central journal article supplement (PMC5555377)
Supplement: NIHMS887965-supplement.pdf [file NIHMS887965-supplement.pdf]

**A**

**Dry**

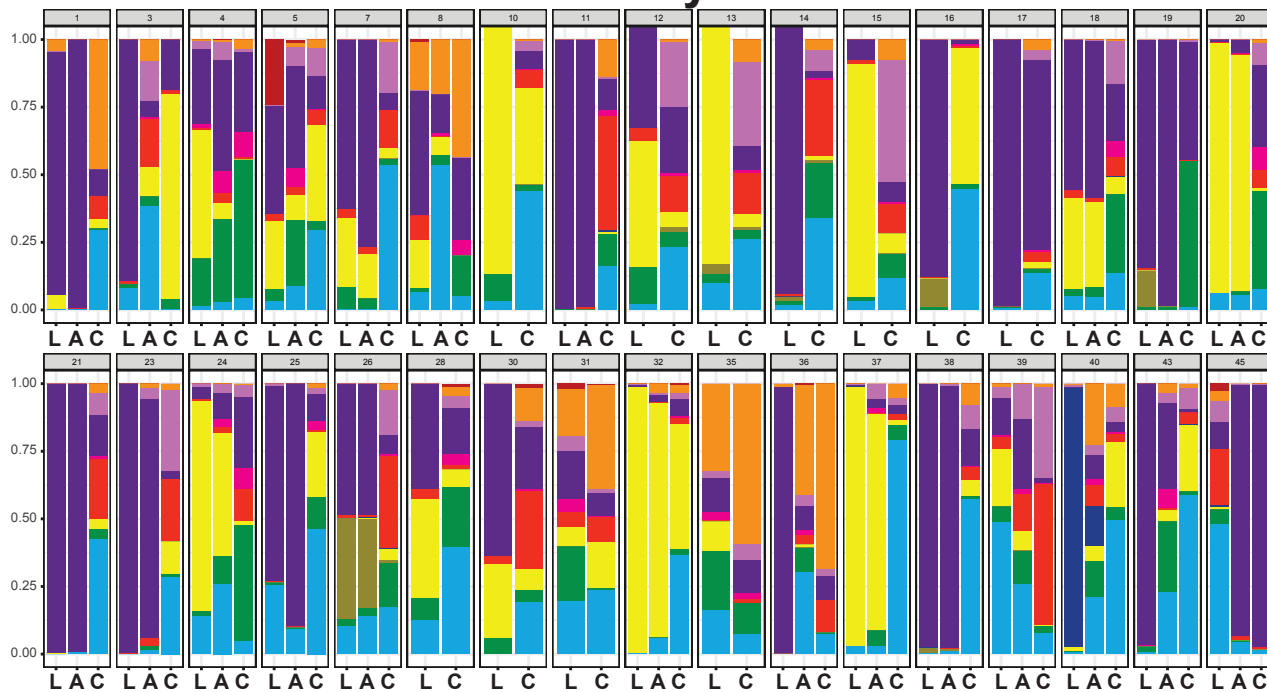

**Sebaceous**

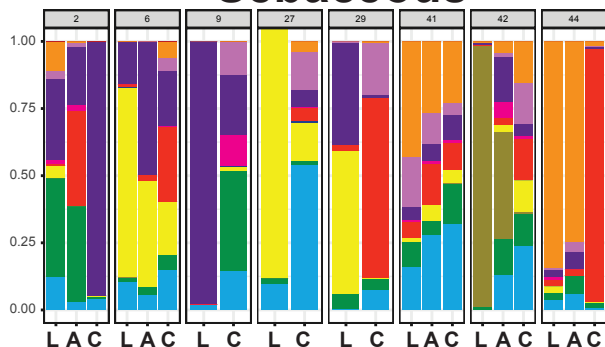

**Moist**

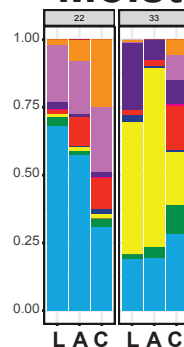

**Taxa**

- Unclassified Bacteroides
- Bacillus flexus
- Unclassified Staphylococcus
- Staphylococcus aureus
- Staphylococcus epidermidis
- Unclassified Gemellales
- Unclassified Enterococcus
- Unclassified Streptococcus
- Streptococcus agalactiae
- Unclassified Bacilli
- Other

**B**

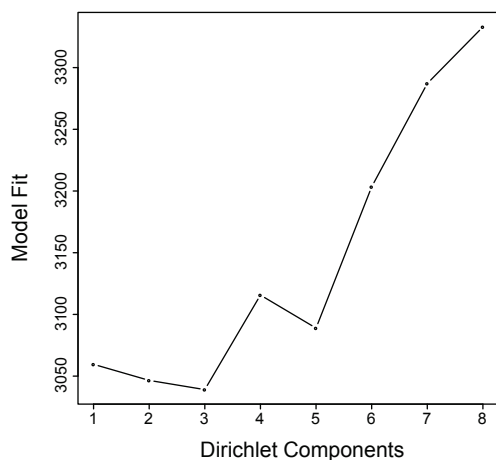

**C**

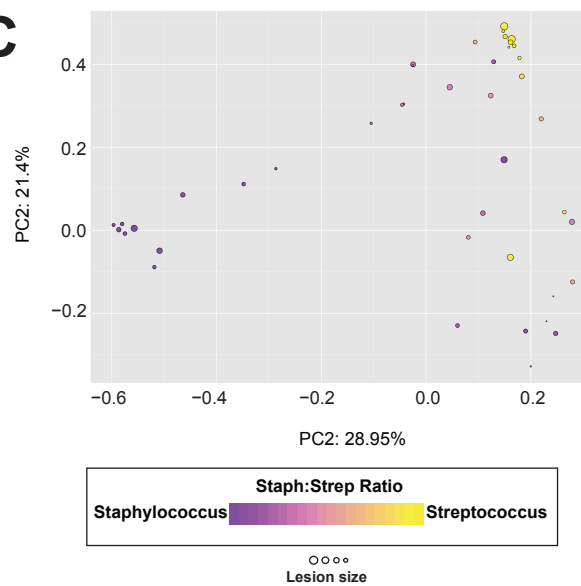

**Supplemental Figure 1. Samples from patients are diverse and lesions cluster into 3 community types, Related to Figure 1.**

(A) Stacked bar charts represent the proportion of the top 10 taxa present in each sample. Patients are identified by number and skin type is identified as lesion (L), adjacent skin sites (A), or contralateral skin sites (C). (B) Laplace approximation of model evidence was used to measure the model fit. The lowest value (3) indicates the best fit for the model. (C) PCoA values for weighted UniFrac analysis were plotted and colored based on the ratio of the abundances of Staphylococcus spp. to Streptococcus spp. in each lesions sample and circle size is based on size of the lesion of each sample.

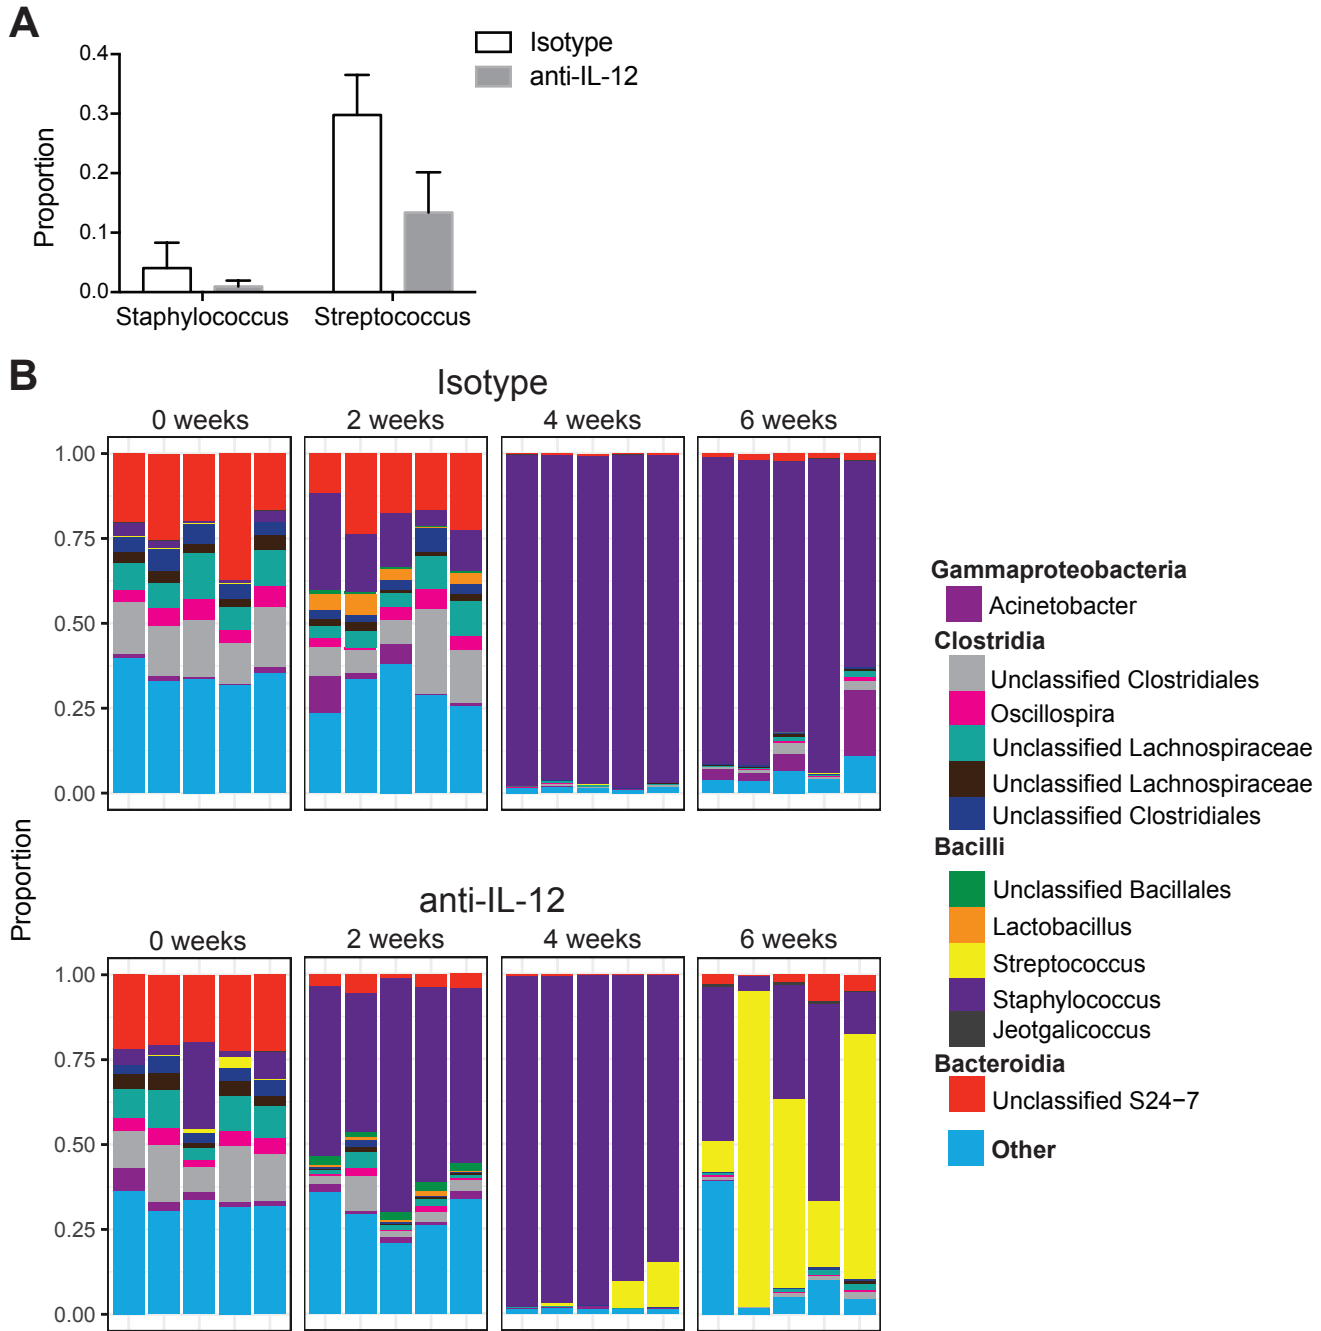

**Supplemental Figure 2. Anti-IL-12 treatment alters the skin microbiota during *L. major* infection, but not on naive skin, Related to Figure 3.** (A) C57BL/6 mice were treated with an isotype or anti-IL-12 mAb twice a week. Swabs were collected prior to treatment and at 2 weeks post-treatment to assess the proportion of *Staphylococcus* spp. and *Streptococcus* spp. by 16S rRNA gene analysis. Data are representative of one independent experiment ( $n = 1$  swab of each ear from 3 mice in each group). (B) Isotype and anti-IL-12 mAb treated mice were intradermally infected in the ear with *L. major* parasites. Swabs were collected for 16S rRNA gene sequencing at 0 weeks (before treatment and infection) and at 2, 4, and 6 weeks post-infection. Stacked bar charts represent the proportion of each taxa present within the samples. Data are representative of two independent experiments ( $n = 1$  lesional swab from 10 mice in each group).

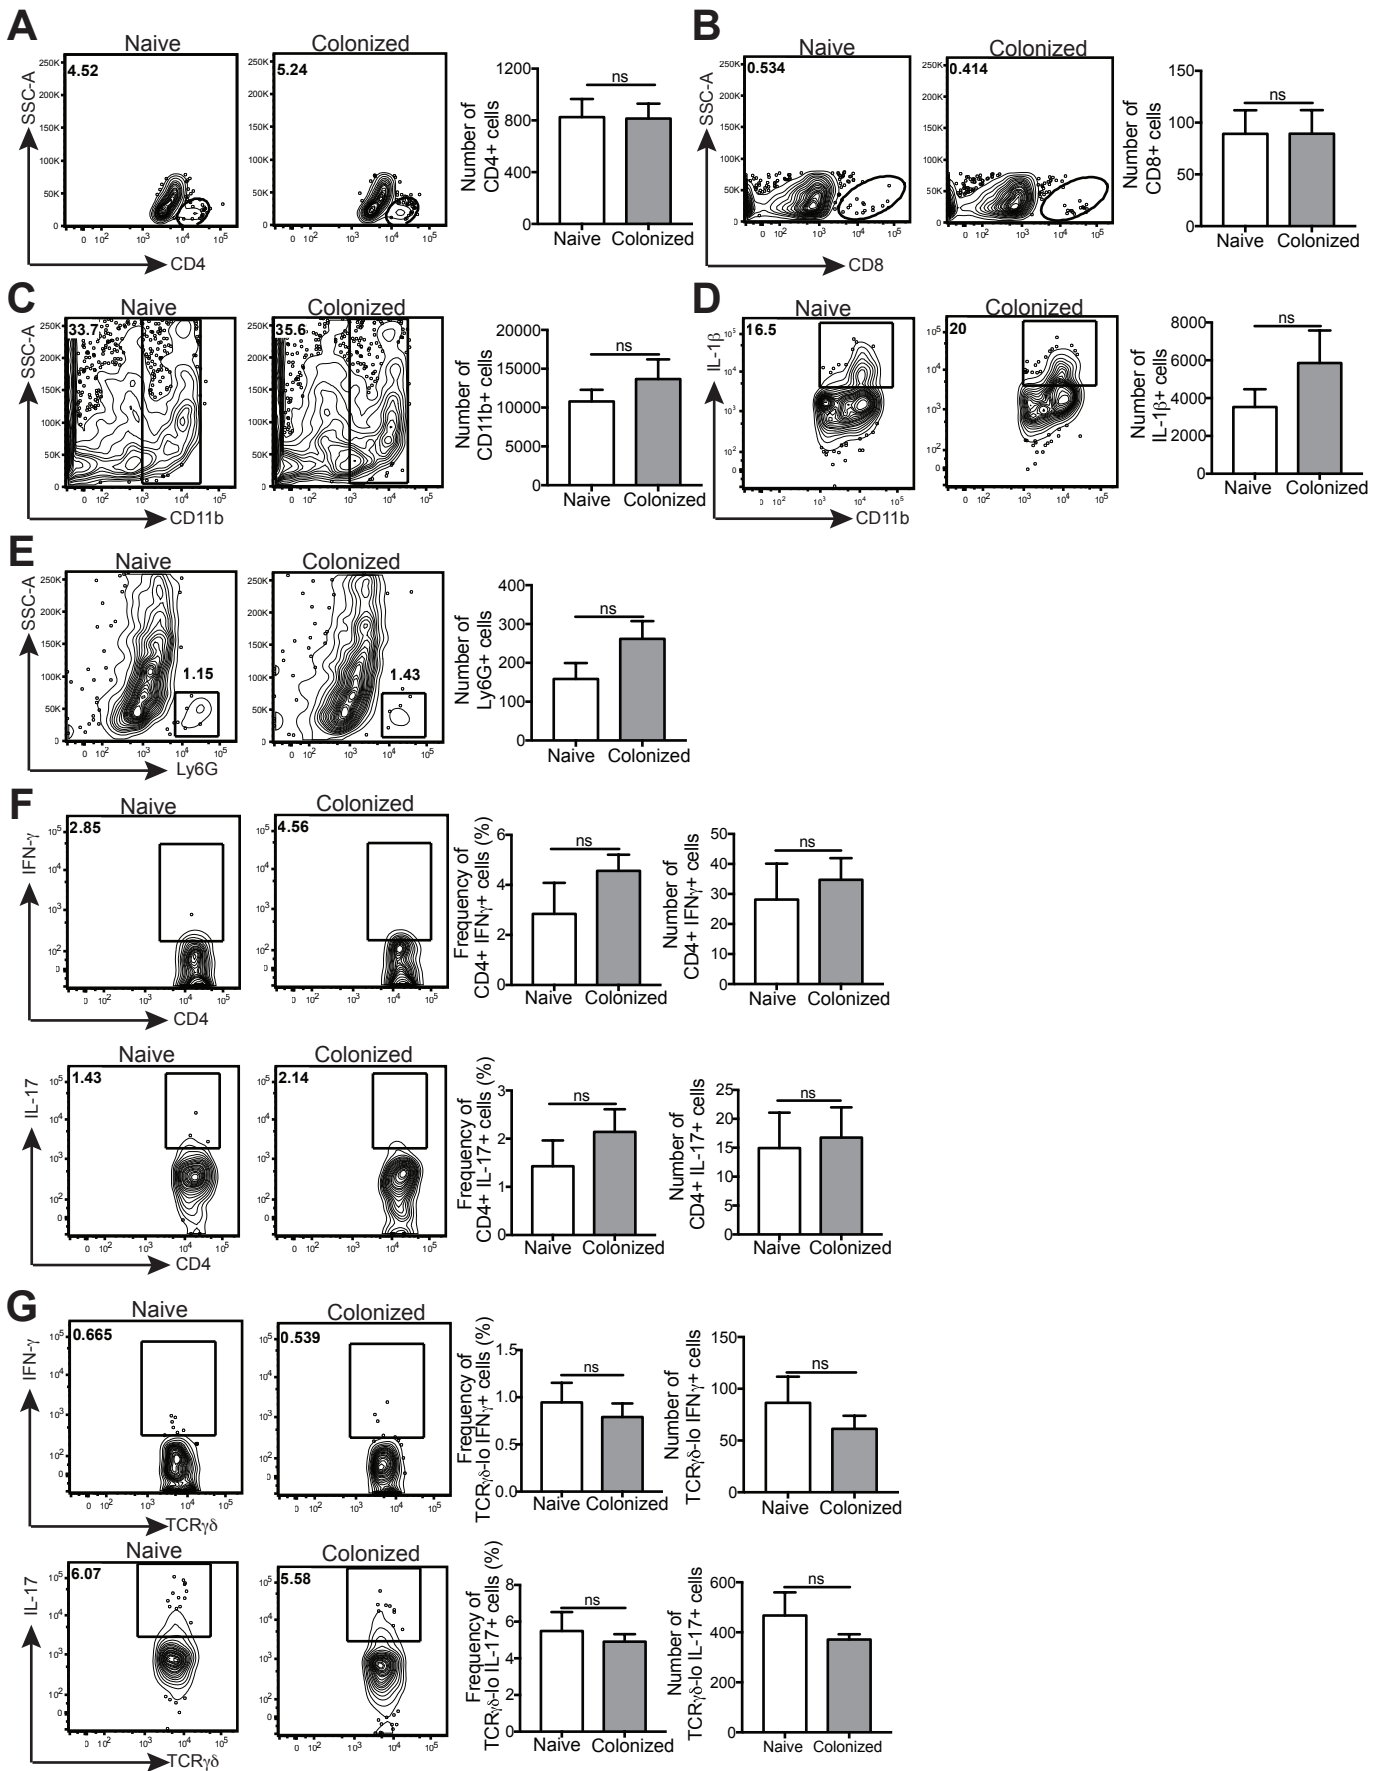

**Supplemental Figure 3. Dysbiosis due to *S. xylosum* colonization does not alter the immune response or cytokine production in naive skin, Related to Figure 4.** C57BL/6 mice were topically colonized with  $10^8$ - $10^9$  *S. xylosum* every other day for a total of 4 applications; naive mice were unassociated. Flow cytometry analysis was performed for the frequency and total cell number of (A) CD4+ T cells (B) CD8+ T cells (C) CD11b+ cells (D) CD11b+ IL-1 $\beta$ + cells (E) Ly6G+ cells (F) CD4+ IFN $\gamma$ + and CD4+ IL-17+ and (G) TCR $\gamma\delta$ + IFN $\gamma$ + and TCR $\gamma\delta$ + IL-17+ cells in the ears of naive or colonized mice 14 days post-association. Cells were pregated on live, singlet, CD45+ cells. Flow cytometry plots are representatives of each group. Data are representative of two independent experiments (n = 1 ear tissue from 4 mice in each group). ns = not significant.

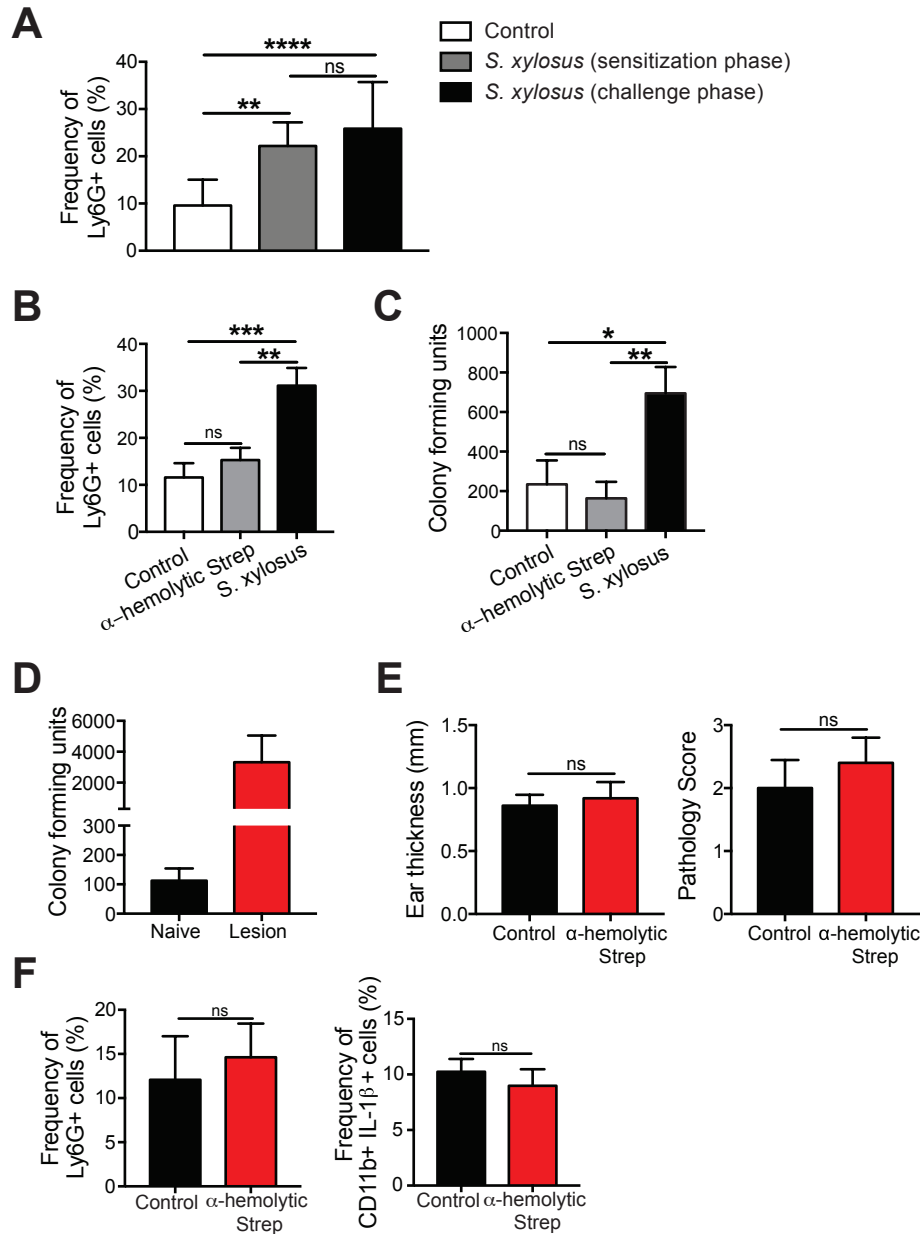

**Supplemental Figure 4. *S. xylosus* only exacerbates inflammation during a barrier breach, while *Streptococcus* does not, Related to Figure 5.** (A) C57BL/6 mice were topically colonized with  $10^8$ - $10^9$  CFU of *S. xylosus* prior to the sensitization phase or on each day of the challenge phase of DNFB treatment. Control mice were unassociated, then sensitized and challenged with DNFB. Bar graphs of skin cells depict the frequency of Ly6G+ cells present in the ear skin on day 8. Data are representative of one experiment (n = 1 ear tissue from 5 mice in each group). (B) C57BL/6 mice were topically associated with  $10^8$ - $10^9$  CFU of an alpha hemolytic *Streptococcus* isolate or *S. xylosus* every other day for 4 applications and control C57BL/6 mice were left unassociated. The next day, all mice were treated on the belly with DNFB. Five days later, mice were challenged with DNFB. Bar graphs depict the frequency of Ly6G+ cells present in the ear skin. (C) Colony forming units were measured after skin homogenates were cultured on tryptic soy blood agar plates overnight from the ears of control and alpha hemolytic *Streptococcus* or *S. xylosus* associated mice. Data are representative of two independent experiments (n = 1 ear tissue from 5 mice in each group). (D) C57BL/6 mice were intradermally infected with *L. major*. At 3 weeks post-infection, mice were topically associated with  $10^8$ - $10^9$  CFU of an alpha hemolytic *Streptococcus* isolate every other day for 4 applications and control C57BL/6 mice were left unassociated. Colony forming units were measured after skin homogenates were cultured on tryptic soy blood agar plates overnight from the ear skin of control and alpha hemolytic *Streptococcus* associated mice. (E) Lesion size and pathology were assessed after colonization. (F) Bar graphs of skin cells depict the frequency of Ly6G+ and IL-1 $\beta$ + cells present in the ear skin. Data are representative of one experiment (For colonized naive mice, n = 1 ear tissue from 5 mice; for colonized infected mice, n = 1 ear tissue from 5 mice; for uncolonized control mice, n = 1 ear tissue from 5 mice). ns = not significant; \*, p < 0.05; \*\*, p < 0.01; \*\*\*, p < 0.001; \*\*\*\*, p < 0.0001.

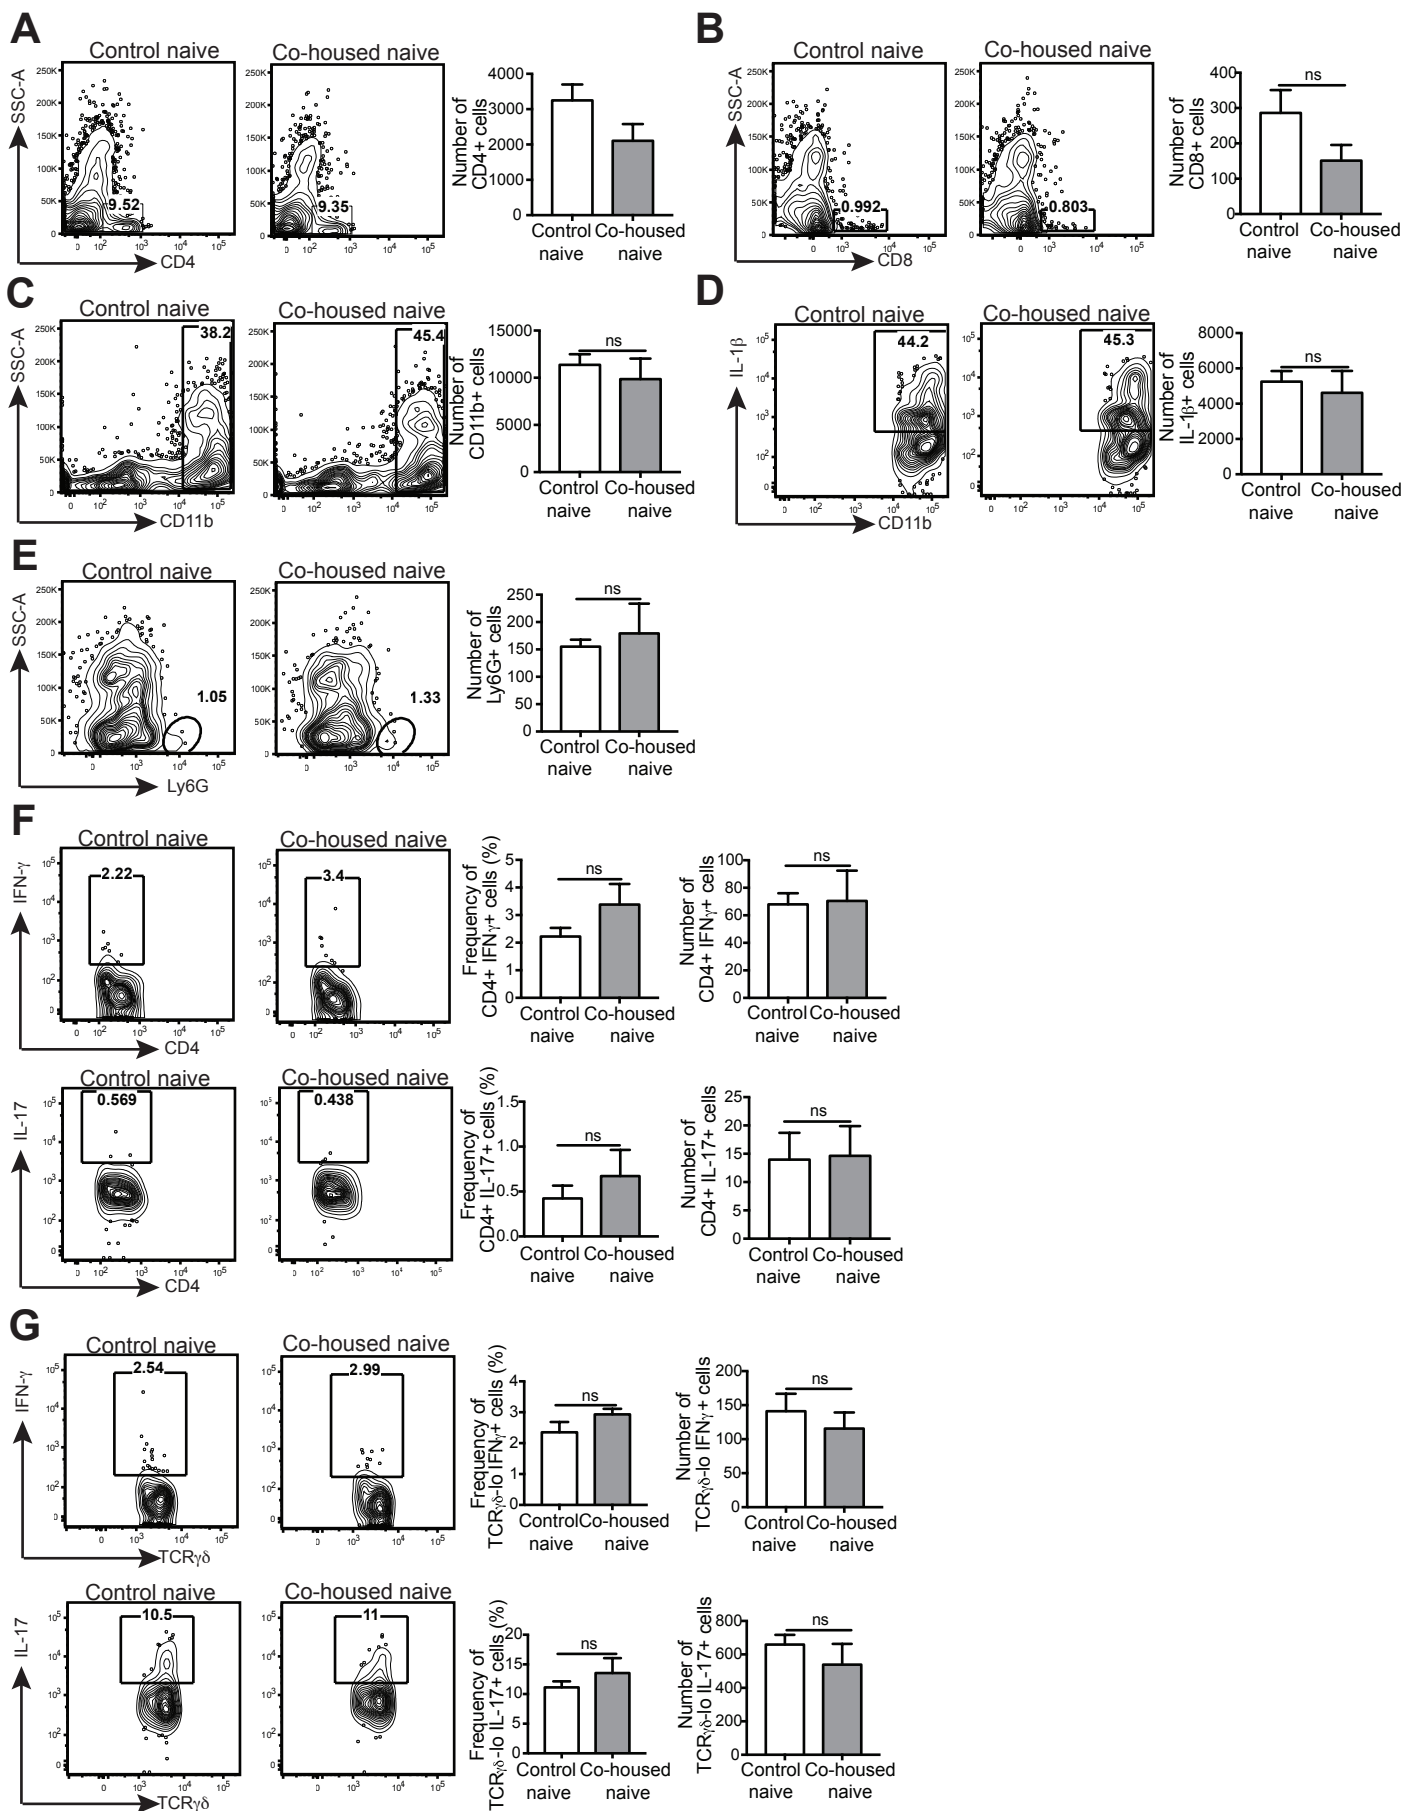

**Supplemental Figure 5. Dysbiosis due to co-housing does not alter the immune response or cytokine production**

**in naive skin, Related to Figure 6.** Naïve C57BL/6 mice were co-housed with *L. major* infected mice for 6 weeks, while control naïve mice were housed separately. Cells were isolated from the ears of co-housed naïve mice and control naïve mice. Flow cytometry analysis was performed for the frequency and total cell number of (A) CD4+ T cells (B) CD8+ T cells (C) CD11b+ cells (D) CD11b+ IL-1 $\beta$ + cells (E) Ly6G+ cells (F) CD4+ IFN $\gamma$ + and CD4+ IL-17+ and (G) TCR $\gamma\delta$ + IFN $\gamma$ + and TCR $\gamma\delta$ + IL-17+ cells in the ears of naïve or co-housed mice. Cells were pregated on live, singlet, CD45+ cells. Flow cytometry plots are representatives of each group. Data are representative of one experiment (Co-housed naïve, n = 1 ear tissue from 4 mice; control naïve, n = 1 ear tissue from 5 mice). ns = not significant.

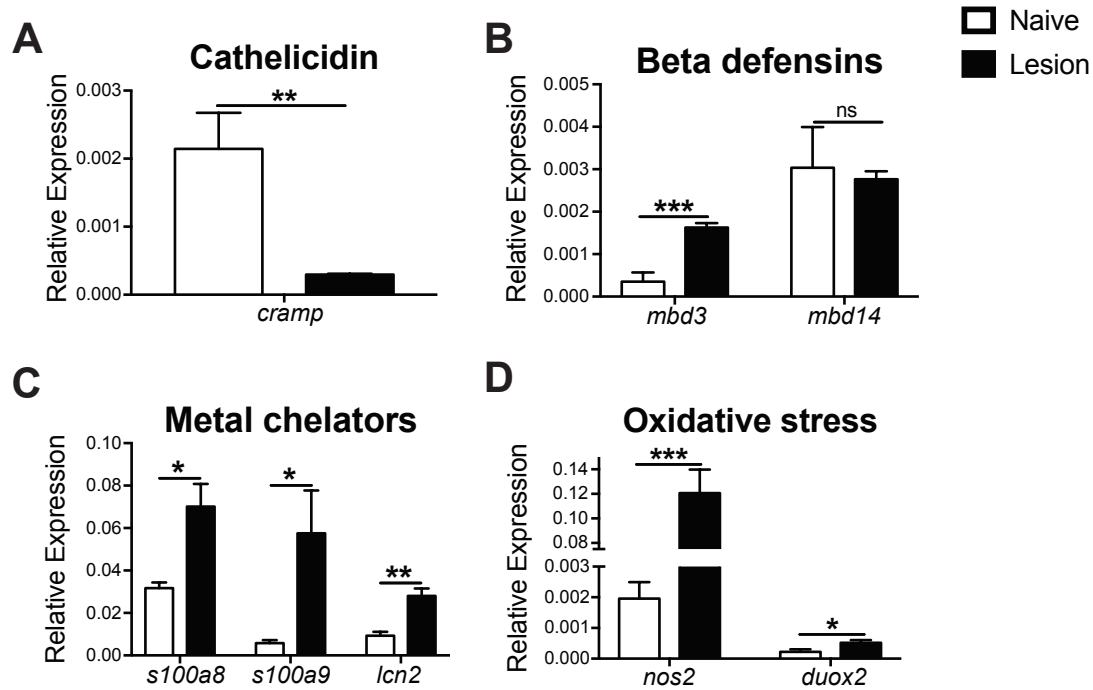

**Supplemental Figure 6. *L. major* infection alters the expression of antimicrobial peptides in the skin, Related to Figure 1.** C57BL/6 mice were intradermally infected with *L. major* in the ear for 5 weeks.

Ear skin was harvested from naive and infected mice and mRNA expression was assessed for (A) the murine cathelicidin gene, (B) beta defensin genes, (C) metal chelators genes and (D) oxidative stress genes. Data are representative of two independent experiments (For naive group, n = 1 ear tissue from 4 mice; for infected mice n = 1 ear tissue from 7 mice). ns = not significant; \*, p < 0.05; \*\*, p < 0.01; \*\*\*, p < 0.001.

| Subject ID | Sex    | Age | Body Site | Lesion Size (mm2) | Duration of Lesion (Days) | Skin Test (mm2) |
|------------|--------|-----|-----------|-------------------|---------------------------|-----------------|
| 1          | Male   | 22  | Leg       | 396               | 30                        | 440             |
| 2          | Male   | 43  | Neck      | 216               | 30                        | 225             |
| 3          | Male   | 18  | Ankle     | NA                | 40                        | 300             |
| 4          | Male   | 24  | Leg       | 225               | 40                        | 144             |
| 5          | Male   | 20  | Leg       | 660               | 90                        | 725             |
| 6          | Male   | 16  | Back      | 500               | 30                        | 440             |
| 7          | Female | 30  | Leg       | 544               | 21                        | 225             |
| 8          | Male   | 36  | Thigh     | 437               | 30                        | Negative        |
| 9          | Male   | 31  | Face      | 840               | 60                        | 300             |
| 10         | Male   | 22  | Arm       | 49                | 30                        | 400             |
| 11         | Female | 24  | Thigh     | 25                | 30                        | 210             |
| 12         | Female | 39  | Leg       | 70                | 30                        | 130             |
| 13         | Male   | 22  | Leg       | 3300              | 40                        | 110             |
| 14         | Female | 45  | Leg       | 180               | 30                        | 378             |
| 15         | Male   | 26  | Leg       | 90                | 10                        | 260             |
| 16         | Male   | 21  | Arm       | 200               | 60                        | 400             |
| 17         | Female | 33  | Leg       | 380               | 40                        | NA              |
| 18         | Male   | 21  | Leg       | 780               | 21                        | 228             |
| 19         | Female | 20  | Leg       | 80                | 30                        | 100             |
| 20         | Male   | 29  | Leg       | 500               | 60                        | 180             |
| 21         | Female | 35  | Leg       | 100               | 60                        | 255             |
| 22         | Male   | 37  | Foot      | 24                | 60                        | 300             |
| 23         | Female | 26  | Arm       | 130               | 30                        | 285             |
| 24         | Male   | 25  | Leg       | 150               | 21                        | 180             |
| 25         | Male   | 50  | Leg       | 270               | 30                        | 272             |
| 26         | Male   | 55  | NA        | 1575              | 60                        | 1085            |
| 27         | Male   | 18  | Head      | 192               | 34                        | 130             |
| 28         | Male   | 19  | Leg       | 480               | 14                        | 208             |
| 29         | Female | 24  | Abdomen   | 325               | NA                        | 700             |
| 30         | Male   | 40  | Leg       | 130               | 20                        | 460             |
| 31         | Male   | 57  | Leg       | 35                | 45                        | 132             |
| 32         | Male   | 18  | Leg       | 49                | 20                        | 400             |
| 33         | Male   | 19  | Foot      | 306               | 15                        | 441             |
| 34         | Male   | 28  | Leg       | 25                | 15                        | 49              |
| 35         | Male   | 39  | Leg       | 77                | 30                        | 255             |
| 36         | Male   | 31  | Leg       | 330               | 90                        | 130             |
| 37         | Female | 24  | Leg       | 1476              | 60                        | 625             |
| 38         | Male   | 63  | Leg       | 272               | 20                        | 196             |
| 39         | Male   | 20  | Arm       | 1377              | 45                        | 225             |
| 40         | Female | 16  | Chest     | 30                | 20                        | 156             |
| 41         | Female | 24  | Back      | 255               | 30                        | 144             |
| 42         | Female | 64  | Leg       | 216               | 30                        | NA              |
| 43         | Male   | 33  | Abdomen   | 207               | 40                        | 289             |
| 44         | Male   | 59  | Thigh     | 340               | 90                        | 255             |

**Supplemental Table 1. Information about samples collected from cutaneous leishmaniasis patients, Related to Figure 1.** Swabs were collected from these cutaneous leishmaniasis patients prior to treatment. All cutaneous leishmaniasis patients were seen at the health post in Corte de Pedra, Bahia, Brazil, which is a well-known area of *L. braziliensis* transmission. The criteria for diagnosis were a clinical picture characteristic of cutaneous leishmaniasis in conjunction with parasite isolation or a positive delayed-type hypersensitivity response to *Leishmania* antigen, plus histological features of cutaneous leishmaniasis.

| Taxa                          | Cluster 1   | Cluster 2  | Cluster 3   |
|-------------------------------|-------------|------------|-------------|
| Staphylococcus aureus         | 0.788992731 | 0.16077901 | 0.049802691 |
| Unclassified Streptococcus 1  | 0.022511662 | 0.11087683 | 0.814618671 |
| Unclassified Bacilli          | 0.04901982  | 0.10691883 | 0.018451401 |
| Unclassified Gemellales       | 0.030965307 | 0.06667456 | 0.013448359 |
| Unclassified Staphylococcus 1 | 0.013819064 | 0.06478127 | 0.005975455 |
| Bacillus flexus               | 0.002613152 | 0.06594624 | 0.00479366  |
| Unclassified Staphylococcus 2 | 0.010710605 | 0.02253503 | 0.004936899 |
| Unclassified Streptococcus 2  | 0.007199348 | 0.0130796  | 0.01322084  |
| Unclassified Bacillales       | 0.002463076 | 0.02473744 | 0.001617316 |
| Staphylococcus epidermidis    | 0.001303855 | 0.02767135 | 0.001574108 |

**Supplemental Table 2. DMN Clusters top 10 discriminating taxa, Related to Figure 1.**

Bacteria represent the top 10 discriminating taxa present in each DMN cluster. Numbers depict the proportion of each taxa in clusters 1-3.



| <b>Primer</b>          | <b>Sequence</b>            |
|------------------------|----------------------------|
| <i>Rps11</i> , forward | 5'-CGTGACGAAGATGAAGATGC-3' |
| <i>Rps11</i> , reverse | 5'-GCACATTGAATCGCACAGTC-3' |
| <i>Il17</i> , forward  | 5'-CATGAGTCCAGGGAGAGCTT-3' |
| <i>Il17</i> , reverse  | 5'-GCTGAGCTTTGAGGGATGAT-3' |
| <i>Tnfa</i> , forward  | 5'-TCACTGGAGCCTCGAATGTC-3' |
| <i>Tnfa</i> , reverse  | 5'-GTGAGGAAGGCTGTGCATTG-3' |
| <i>Il1b</i> , forward  | 5'-TTGACGGACCCCAAAGAT-3'   |
| <i>Il1b</i> , reverse  | 5'- GATGTGCTGCTGCGAGATT-3' |
| <i>Cxcl1</i> , forward | 5'-GCACCCAAACCGAAGTCATA-3' |
| <i>Cxcl1</i> , reverse | 5'-CTTGGGGACACCTTTTAGCA-3' |
| <i>Ccl2</i> , forward  | 5'-GCTTCTGGGCCTGCTGTTCA-3' |
| <i>Ccl2</i> , reverse  | 5'-AGCTCTCCAGCCTACTCATT-3' |

**Supplemental Table 3. Oligonucleotide sequences, Related to Figure 4.**  
Primers used for RT-PCR on whole ear skin tissue.
